## RESEARCH ARTICLE

# Impact of Ramadan fasting on serum levels of major endocrinology hormonal and biochemical parameters in healthy non-athlete adults: A systematic review and meta-analyses

Mohammad Poursalehian<sup>1,2</sup>, Shahrzad Mohseni<sup>1\*</sup>, Zhaleh Shadman<sup>3</sup>, Mohammadreza Mohajeri-Tehrani<sup>1\*</sup>, Rasha Atlasi<sup>1</sup>, Mohsen Khoshniat Nikoo<sup>4</sup>, Mostafa Qorbani<sup>5</sup>, Bagher Larijani<sup>1</sup>

**1** Endocrinology and Metabolism Research Center, Endocrinology and Metabolism Clinical Sciences Institute, Tehran University of Medical Sciences, Tehran, Iran, **2** Students' Scientific Research Center (SSRC), Tehran University of Medical Sciences, Tehran, Iran, **3** Elderly Health Research Center, Endocrinology and Metabolism Population Sciences Institute, Tehran University of Medical Sciences, Tehran, Iran, **4** Diabetes Research Center, Endocrinology and Metabolism Clinical Sciences Institute, Tehran University of Medical Sciences, Tehran, Iran, **5** Non-Communicable Diseases Research Center, Alborz University of Medical Sciences, Karaj, Iran

\* [sh-mohseni@farabi.tums.ac.ir](mailto:sh-mohseni@farabi.tums.ac.ir) (SM); [mrmohajeri@tums.ac.ir](mailto:mrmohajeri@tums.ac.ir) (MM-T)

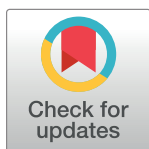

## OPEN ACCESS

**Citation:** Poursalehian M, Mohseni S, Shadman Z, Mohajeri-Tehrani M, Atlasi R, Khoshniat Nikoo M, et al. (2024) Impact of Ramadan fasting on serum levels of major endocrinology hormonal and biochemical parameters in healthy non-athlete adults: A systematic review and meta-analyses. PLoS ONE 19(5): e0299695. <https://doi.org/10.1371/journal.pone.0299695>

**Editor:** Atiyeh Abdallah, Qatar University, College of Health Sciences, QATAR

**Received:** June 22, 2023

**Accepted:** February 14, 2024

**Published:** May 23, 2024

**Copyright:** © 2024 Poursalehian et al. This is an open access article distributed under the terms of the [Creative Commons Attribution License](https://creativecommons.org/licenses/by/4.0/), which permits unrestricted use, distribution, and reproduction in any medium, provided the original author and source are credited.

**Data Availability Statement:** The compiled raw data and statistical analysis files used in our meta-analysis is available in [Supplementary files](#).

**Funding:** The author(s) received no specific funding for this work.

**Competing interests:** The authors have declared that no competing interests exist.

## Abstract

### Background

Ramadan Intermittent Fasting (RIF) has the potential to alter hormonal levels in the body. This study investigates the impact of RIF on hormonal levels among healthy individuals during Ramadan.

### Methods

A systematic review and meta-analysis of previously published studies were conducted, focusing on healthy non-athlete adults. The intervention examined was Ramadan Intermittent Fasting, and the primary outcomes assessed were changes in endocrine hormonal and biochemical parameters. The pooled effect measure was expressed as odds ratio (OR) and 95% confidence interval (CI) using the random-effects model.

### Results

A total of 35 original articles were retrieved, with a combined sample size of 1,107 participants eligible for the meta-analysis. No significant relationship was found between pre- and post-Ramadan hormonal levels of T3, T4, TSH, FT3, FT4, Testosterone, LH, FSH, Prolactin, PTH, Calcium, and Phosphorus (P-value<0.05). However, a substantial decrease in morning cortisol levels was observed across the studies (P-value: 0.08, Hedges' g = -2.14, 95% CI: -4.54, 0.27).

## Conclusions

Ramadan Intermittent Fasting results in minimal hormonal changes and is a safe practice for healthy individuals. The fasting regimen appears to disrupt the circadian rhythm, leading to a decrease in morning cortisol levels.

## Introduction

Ramadan, the ninth month of the Islamic lunar calendar, holds significant religious importance for the global Muslim community. One of the Five Pillars of Islam, Ramadan, mandates a month-long period of fasting from dawn to dusk for healthy adult Muslims [1, 2]. This period of intermittent fasting, which extends roughly between 11 to 18 hours per day, is a unique metabolic state that has sparked considerable scientific interest over the past few decades [3].

Given the shift in eating patterns, energy consumption, and sleep cycles, Ramadan fasting can influence various physiological and biological processes, potentially affecting the body's hormonal and biochemical landscape [4–6]. Various hormones such as insulin, cortisol, leptin, and ghrelin, which are critical regulators of our metabolism, might undergo changes during this fasting period. Similarly, the fasting state can also impact key biochemical parameters, including glucose, lipid, and protein metabolism [7, 8].

Several individual studies have looked into these effects, with some suggesting significant changes, while others report minimal or no impacts. The rationale for our systematic review rests on its broader analytical lens, examining both major endocrine hormones and key biochemical parameters. While we acknowledge and have cited existing reviews that focus on specific aspects such as glucometric markers [9], our work aims to offer a more comprehensive assessment of the metabolic and hormonal changes associated with Ramadan fasting in healthy non-athlete adults. In line with the PICOS framework, our research objective is: (P) Healthy non-athlete adults; (I) Observing Ramadan fasting; (C) Measurements before the onset of Ramadan (pre-fasting values); (O) Changes in serum levels of T3, T4, TSH, FT3, FT4, Testosterone, LH, FSH, Prolactin, PTH, Calcium, Phosphorus, and morning cortisol; (S) Observational studies, case-control studies, and quasi-controlled studies. Through this review, we aim to discern whether and to what extent Ramadan fasting influences these critical endocrine parameters in the specified population.

## Material and methods

### Ethical approval

The study protocol was reviewed and accepted by the ethics committee of the Endocrinology and Metabolism Research Institute of Tehran University of Medical Sciences (ID: IR.TUMS.EMRI.REC.1395.00143).

### Registration

The protocol of this systematic review was registered a priori in PROSPERO (CRD42020135123).

## Database searches

This systematic review and meta-analysis was conducted according to the Preferred Reporting Items for Systematic reviews and Meta-Analyses (PRISMA) guidelines [10].

## Search strategy

A comprehensive literature search was carried out on the Web of Science, PubMed, Scopus, Cochrane Library, and Embase databases in September 2023. The search focused on full published papers in any language. Given the nature of Ramadan fasting, studies evaluated hormonal and biochemical changes before and after Ramadan; therefore, only observational studies were included. Our search strategy combined keywords such as: "Fasting", "Ramadan", and "Hormones" along with their Medical Subject Headings (MeSH) terms. All retrieved papers were imported into Endnote Reference Manager. Duplicates were identified and excluded using the "remove duplicates" function and manual checks. Additional articles were sourced by hand-searching reference lists of included articles and using Google Scholar.

## Study selection

Three reviewers (SHM and MP and JSH) independently screened the titles and abstracts of identified studies and full-text reports of eligible studies were obtained for data extraction. Where there was a lack of consensus an expert consultation was performed.

## Inclusion criteria

Population (P): Healthy adults without limitations regarding gender, ethnicity, and geographical area.

Intervention (I): Observing the effects of Ramadan fasting on the parameters of interest.

Comparison (C): Changes in the parameters of interest before (baseline—a few days before or the first day of Ramadan) and after the completion of Ramadan or at least 2 weeks into the fasting month.

Outcome (O): Levels of hormones/biochemical parameters of interest.

Study design (S): Observational studies published in peer-reviewed journal of any language.

## Exclusion criteria

Studies on special populations like athletes, pregnant or lactating women, and patients with different illnesses.

Studies using specimens other than serum for parameter evaluations (e.g., serum vs. salivary for cortisol).

Studies providing results solely through graphs without numerical data.

Conference abstracts, case reports, editorials, review articles, letters, animal studies, and unpublished papers (since they did not undergo peer-review process).

Studies that are published in predatory journals according to Bell's list

Inaccessibility of the full text even after contacting the corresponding author thrice via email.

## Grouping for syntheses

By Parameter of Interest: Studies will further be grouped based on the specific hormone or biochemical parameter they are analyzing.

## Main outcomes and measures

Main outcome measures consisted of the mean changes in serum levels of parameters of interest in terms of before Ramadan, during Ramadan (if applicable), end of Ramadan, and post Ramadan (if applicable): TSH, T4, T3, LH, FSH, testosterone, cortisol, prolactin, PTH, calcium, and phosphorous. Among the included studies these parameters were the main frequently used outcome that were available.

## Data extraction

Data extraction was performed by two mentioned investigators. Information extracted from articles was first author name, year of published study, design, participants' characteristics (sample size, gender, and age, fasting time and place, duration of fasting (hours) and time measures of hormones.

## Quality assessment of studies

The JBI (Joanna Briggs Institute) Critical Appraisal Checklist was used by three reviewers independently to appraise the methodological quality of the included studies [11, 12]. Bias was appraised through nine questions that aim to evaluate the research design of the study followed by the similarities of participants in any comparison and the type of care they received checklists consist of items to assess selection, the existence of a control group, the existence of multiple measurements, follow-up description, the existence of same outcome measurement, reliability of outcome measurements, and the appropriate statistical analysis used. Each criterion had four possible responses including "Yes," "No," "Unclear," or "not applicable. JBI checklist is not a scoring system for grading the studies as well as lack of any consensus about cut-off point for defining the inclusion of the study [13]. (Table 1)

## Strategy for data synthesis

**Qualitative literature review.** The evidence of changes in hormonal levels and biochemical parameters during Ramadan Fasting were narratively synthesized, separately. However, the conclusion from the narrative review was planned to be validated by conducting a subsequent meta-analysis.

**Quantitative literature review (meta-analysis).** Continuous variables were presented as means and standard deviations (SD). Whenever an article reported standard error (SE) instead of standard deviation, standard deviations were calculated based on the formula association among them ( $SE = SD/\sqrt{n}$ ). Categorical (binary) data were reported as n (%). whenever it was possible to conduct a meta-analysis, it was performed with STATA software, version 17(Stata Corp, USA).

**Heterogeneity Assessment:** The Chi-square-based Q-test was used to assessing heterogeneity and was considered to be statistically significant at  $P < 0.1$ . The degree of heterogeneity was estimated using  $I^2$  statistic. In overall, the  $I^2$  value of 25% was considered low, the  $I^2$  value of 50% was considered as moderate, and the  $I^2$  value of 75% and more was considered as high heterogeneity [14]. Due to the limited number of included studies in each group, a deeper exploration of the sources of heterogeneity was not feasible. Specifically, methodologies such as subgroup analysis, meta-regression, and sensitivity analyses were not conducted due to the insufficient quantity of studies, making these analyses less meaningful and potentially misleading.

**Effect Size Measurement:** The Fixed-effect model was performed, when no significant statistical heterogeneity between studies were detected ( $P > 0.2$ ), a in case of presenting any

Table 1. Summary of the quality appraisal for the included studies using the Joanna Briggs Institute (JBI) Critical Appraisal Checklist.

|    | Author, year              | the 'cause' and is the 'effect' clearly defined | Similarity of the participants included in any comparisons | receiving similar treatment/care in any participants | multiple measurements of the outcome | Completeness of follow-up | Outcome measured in the same way | Reliability of outcomes measured | appropriate statistical analysis using |
|----|---------------------------|-------------------------------------------------|------------------------------------------------------------|------------------------------------------------------|--------------------------------------|---------------------------|----------------------------------|----------------------------------|----------------------------------------|
| 1  | Fedail, S. S. 1982 [16]   | +                                               | N/A                                                        | N/A                                                  | +                                    | +                         | N/A                              | +                                | +                                      |
| 2  | Abbas, S. M. 1986 [17]    | +                                               | N/A                                                        | N/A                                                  | +                                    | +                         | N/A                              | +                                | +                                      |
| 3  | Azizi, F 1987 [18]        | +                                               | N/A                                                        | N/A                                                  | +                                    | +                         | N/A                              | ?                                | +                                      |
| 4  | Sulimani, R. A. 1988 [19] | +                                               | N/A                                                        | N/A                                                  | +                                    | +                         | N/A                              | +                                | +                                      |
| 5  | Azizi, F 1991 [20]        | +                                               | N/A                                                        | N/A                                                  | +                                    | +                         | N/A                              | +                                | +                                      |
| 6  | Sajid, KM, 1991 [21]      | +                                               | N/A                                                        | N/A                                                  | +                                    | +                         | N/A                              | +                                | +                                      |
| 7  | Bakir, SM, 1992 [22]      | +                                               | N/A                                                        | N/A                                                  | +                                    | +                         | N/A                              | +                                | +                                      |
| 8  | Azizi F, 1994 [24]        | +                                               | N/A                                                        | N/A                                                  | +                                    | +                         | N/A                              | +                                | +                                      |
| 9  | Bakir, 1994 [25]          | +                                               | N/A                                                        | N/A                                                  | +                                    | +                         | N/A                              | +                                | +                                      |
| 10 | Elati, J. 1995 [27]       | +                                               | N/A                                                        | N/A                                                  | +                                    | +                         | N/A                              | +                                | +                                      |
| 11 | Aybak, 1995 [26]          | +                                               | N/A                                                        | N/A                                                  | +                                    | +                         | N/A                              | +                                | +                                      |
| 12 | Dwivedi, S. 1996 [28]     | +                                               | N/A                                                        | N/A                                                  | +                                    | +                         | N/A                              | ?                                | +                                      |
| 13 | Iraki, 1997 [7]           | +                                               | N/A                                                        | N/A                                                  | +                                    | +                         | N/A                              | +                                | +                                      |
| 14 | Bilto, Y. Y. 1998, [29]   | +                                               | N/A                                                        | N/A                                                  | +                                    | +                         | N/A                              | +                                | +                                      |
| 15 | Mira, S. A. 2002, [30]    | +                                               | N/A                                                        | N/A                                                  | +                                    | +                         | N/A                              | +                                | ?                                      |
| 16 | Ben salem, 2003 [23]      | +                                               | N/A                                                        | N/A                                                  | +                                    | +                         | N/A                              | +                                | +                                      |
| 17 | Shahrzad, M 2003 [31]     | +                                               | N/A                                                        | N/A                                                  | +                                    | +                         | N/A                              | +                                | +                                      |
| 18 | El-Migdadi, F. 2004 [32]  | +                                               | N/A                                                        | N/A                                                  | +                                    | +                         | N/A                              | +                                | +                                      |
| 19 | Mesbahzadeh, B 2005 [1]   | +                                               | N/A                                                        | N/A                                                  | +                                    | +                         | N/A                              | +                                | +                                      |
| 20 | Ahmadinejad, Z. 2006 [5]  | +                                               | N/A                                                        | N/A                                                  | +                                    | +                         | N/A                              | ?                                | +                                      |
| 21 | Ghaderi, 2006 [33]        | +                                               | N/A                                                        | N/A                                                  | +                                    | +                         | N/A                              | +                                | +                                      |
| 22 | Ghiravani, Z 2006 [34]    | +                                               | N/A                                                        | N/A                                                  | +                                    | +                         | N/A                              | +                                | +                                      |
| 23 | Marbut, 2006 [35]         | +                                               | N/A                                                        | N/A                                                  | +                                    | +                         | N/A                              | +                                | +                                      |
| 24 | Mansi, K. 2007 [36]       | +                                               | N/A                                                        | N/A                                                  | +                                    | +                         | N/A                              | +                                | +                                      |
| 25 | Shahabi, 2010 [37]        | +                                               | N/A                                                        | N/A                                                  | +                                    | +                         | N/A                              | +                                | +                                      |
| 26 | Sülü, B. 2010 [38]        | +                                               | N/A                                                        | N/A                                                  | +                                    | +                         | N/A                              | +                                | +                                      |

(Continued)

Table 1. (Continued)

|    | Author, year              | the 'cause' and is the 'effect' clearly defined | Similarity of the participants included in any comparisons | receiving similar treatment/care in any participants | multiple measurements of the outcome | Completeness of follow-up | Outcome measured in the same way | Reliability of outcomes measured | appropriate statistical analysis using |
|----|---------------------------|-------------------------------------------------|------------------------------------------------------------|------------------------------------------------------|--------------------------------------|---------------------------|----------------------------------|----------------------------------|----------------------------------------|
| 27 | Çağlayan, 2012 [39]       | +                                               | N/A                                                        | N/A                                                  | +                                    | +                         | N/A                              | +                                | +                                      |
| 28 | Bahijri, S., A, 2013 [40] | +                                               | N/A                                                        | N/A                                                  | +                                    | +                         | N/A                              | +                                | +                                      |
| 29 | Sayedda, K. 2013 [41]     | +                                               | N/A                                                        | N/A                                                  | +                                    | +                         | N/A                              | +                                | +                                      |
| 30 | Al Nahari, 2014 [42]      | +                                               | N/A                                                        | N/A                                                  | +                                    | +                         | N/A                              | +                                | +                                      |
| 31 | Bahijri, S., A, 2015 [43] | +                                               | N/A                                                        | N/A                                                  | +                                    | +                         | N/A                              | +                                | +                                      |
| 32 | Talib, R. A. 2015 [44]    | +                                               | N/A                                                        | N/A                                                  | +                                    | +                         | N/A                              | ?                                | +                                      |
| 33 | Sedaghat, MR. 2017 [45]   | +                                               | N/A                                                        | N/A                                                  | +                                    | +                         | N/A                              | +                                | +                                      |
| 34 | Papazoglou, 2020 [46]     | +                                               | N/A                                                        | N/A                                                  | +                                    | +                         | N/A                              | +                                | +                                      |
| 35 | Riat, 2021 [47]           | +                                               | N/A                                                        | N/A                                                  | +                                    | +                         | N/A                              | +                                | +                                      |

("+" = "yes," "-" = "no," "N/A" = not applicable and "?" = "unclear")

<https://doi.org/10.1371/journal.pone.0299695.t001>

heterogeneity random-effects model was used ( $p \leq 0.2$ ). Hedges'  $g$  value was used for effect size measurement and also forest plots were used to present the results graphically and to illustrate point estimates of the effect size and 95% confidence interval (CI). An effect size of  $\leq 0.2$  was described as a small effect, an effect size around 0.5 as a medium effect, and an effect size around 0.8 as a large effect [15]. If Hedges'  $g$  CI did not contain 0, In addition to Hedges'  $g$  values and the mean difference's forest plot is illustrated.

Publication Bias: Funnel plots and Egger's test were applied to detect potential publication biases.

## Results

### Characteristics of studies

Through searches across multiple databases and other resources, we identified 13,085 papers relevant to our search strategy. After eliminating duplicate documents, we assessed the titles and abstracts of 8,826 publications, which culminated in the full-text retrieval of 96 papers. Eventually, we included 35 publications (encompassing 1,107 participants: 783 men, 271 women, and 53 unknown gender) in our final analysis (Fig 1) [1, 5, 7, 16–47]. The included studies spanned between 1982 and 2021. Detailed information quality assessment of studies can be found in Table 1. Notably, no studies were removed due to quality assessment.

Among the selected studies, nineteen focused solely on men, four exclusively on women, while twelve reported results for both genders (Table 2). Two studies did not specify the participant number by gender. The mean age of included participants was  $27.99 \pm 6.17$  years, ranging from 17–56. All the studies implemented a pre-post design to report changes in hormones and/or biochemical markers. Notably, none of the studies included a control group of non-fasted participants.

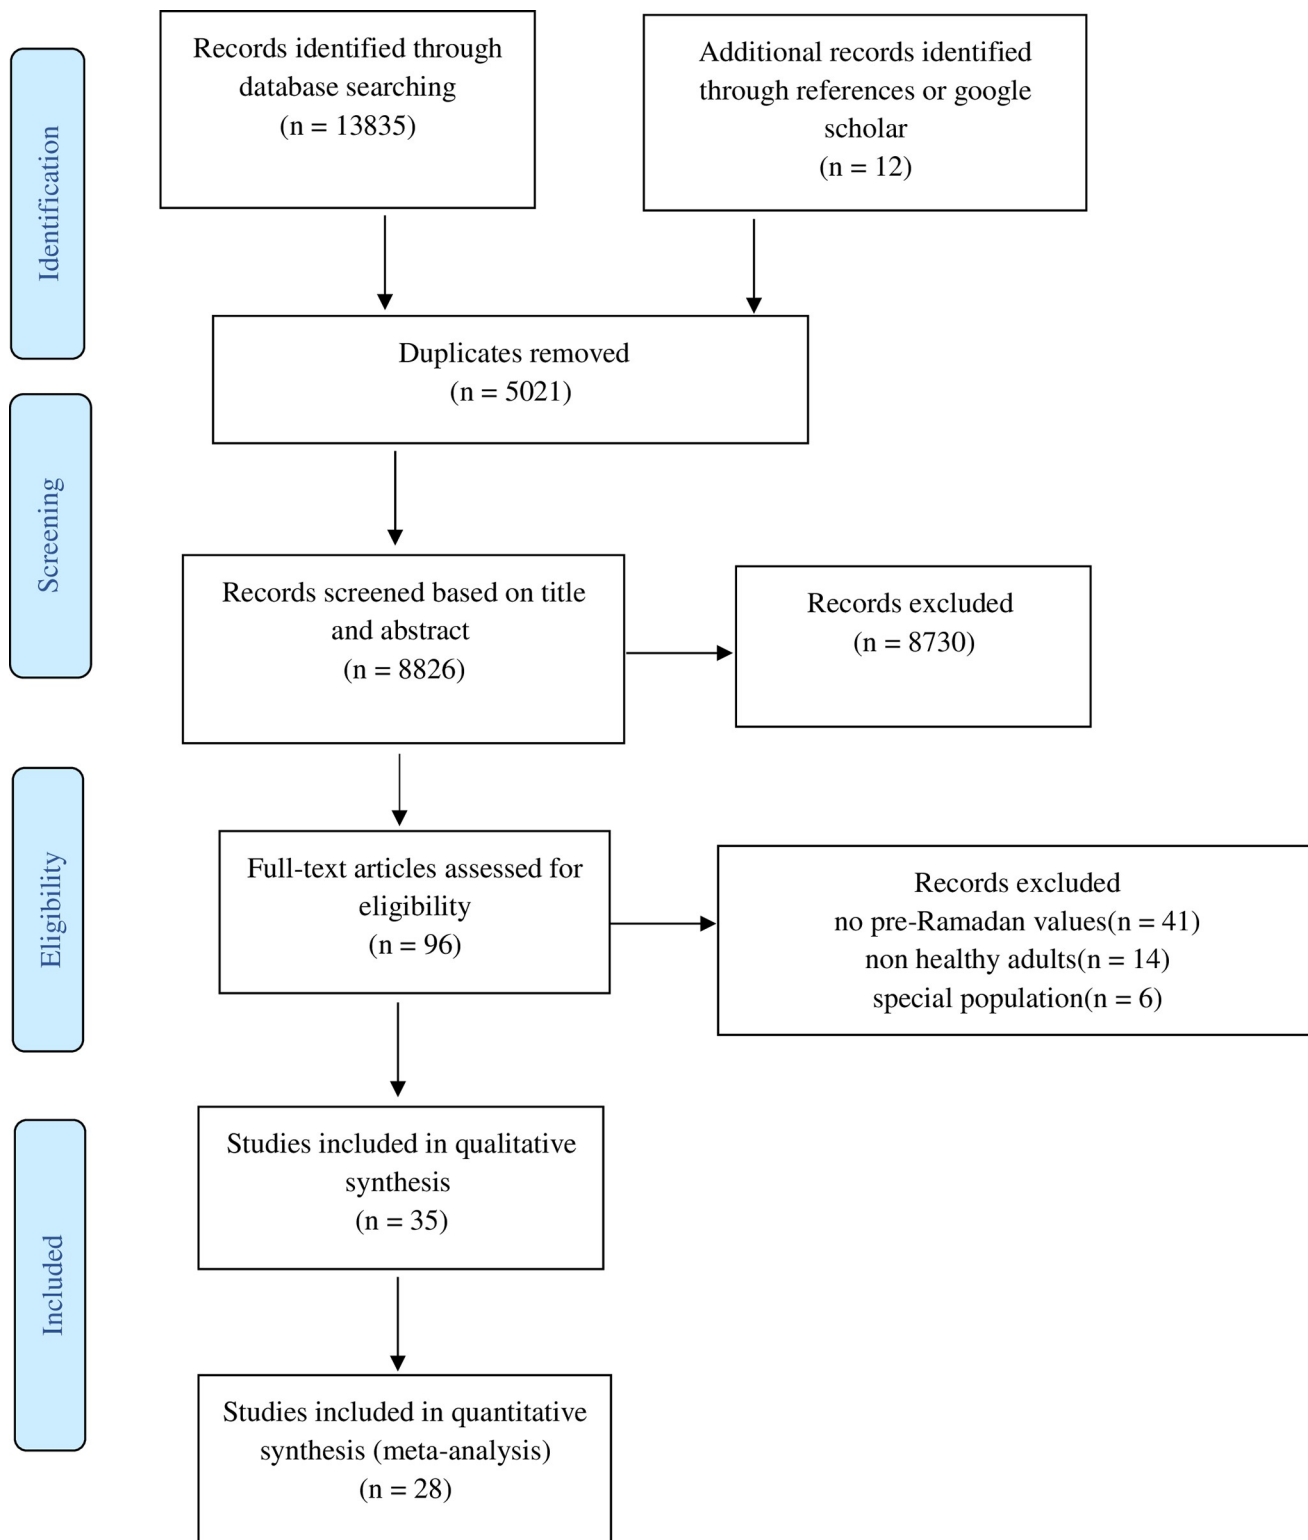

**Fig 1. PRISMA flow diagram for the selected studies.**

<https://doi.org/10.1371/journal.pone.0299695.g001>

Table 2. Baseline characteristic of the included studies in the systematic review.

|    | First Author<br>(year of<br>publication) | location of<br>study    | Sample<br>size<br>/Gender | Season of<br>fasting | mean age<br>(age range),<br>years                          | mean<br>fasting<br>duration<br>(hours) | fasten<br>days | Hormones/<br>biochemical<br>parameters<br>examined | measuring<br>times (relative<br>to the Ramadan<br>fast)                                 | Results (after<br>compared with before<br>Ramadan months)                                                                                     |
|----|------------------------------------------|-------------------------|---------------------------|----------------------|------------------------------------------------------------|----------------------------------------|----------------|----------------------------------------------------|-----------------------------------------------------------------------------------------|-----------------------------------------------------------------------------------------------------------------------------------------------|
| 1  | Fedail, S. S.<br>1982 [16]               | Khartoum,<br>Sudan      | Overall: 24<br>F:4 M:20   | NR                   | 30(21–40)                                                  | 16                                     | NR             | total T4, total<br>T3,                             | 1 <sup>st</sup> and last day                                                            | <ul style="list-style-type: none"> <li>• Significant rise in serum total T4</li> <li>• No significant changes in total T3</li> </ul>          |
| 2  | Abbas, S. M.<br>1986 [17]                | Jeddah,<br>Saudi Arabia | M:8                       | NR                   | NR                                                         | NR                                     | NR             | LH, FSH, PRL,<br>Testosterone                      | Before fast, end<br>of fast, post fast                                                  | <ul style="list-style-type: none"> <li>• Significant increase in LH, and FSH</li> <li>• nonsignificant elevation in testosterone</li> </ul>   |
| 3  | Azizi, F 1987<br>[18]                    | Tehran, Iran            | M:9                       | Summer               | 35(23–54)                                                  | 17                                     | 29             | calcium                                            | 7 days before,<br>29 <sup>th</sup> day, 28<br>days after                                | nonsignificant drop in calcium                                                                                                                |
| 4  | Sulimani, R. A.<br>1988 [19]             | Saudi Arabia            | M:28                      | -                    | 25–50                                                      | 14.5                                   | 30             | TSH, T3, total<br>T4, free T4                      | 1 <sup>st</sup> day/30 <sup>rd</sup> .<br>day                                           | no significant changes in the thyroid function tests                                                                                          |
| 5  | Azizi, F 1991<br>[20]                    | Tehran, Iran            | M:9                       | Summer               | 35(23–54)                                                  | 17                                     | 29             | FSH, LH,<br>testosterone,<br>T4, T3, TSH,<br>PRL   | 7 days before,<br>29 <sup>th</sup> day, 28<br>days after                                | no significant changes in the thyroid function tests, sex hormones, and PRL                                                                   |
| 6  | Sajid, KM,1991<br>[21]                   | Pakistan                | Overall: 46<br>M:41 F:5   | Spring               | 28–56                                                      | 16                                     | 29             | TSH, total T4,<br>total T3                         | 20 days<br>before,26th<br>day,23 days<br>after                                          | <ul style="list-style-type: none"> <li>• significant rise in TSH</li> <li>• no significant change in total T4 or total T3</li> </ul>          |
| 7  | Bakir, SM, 1992<br>[22]                  | Saudi Arabia            | M:11                      | NR                   | 24–46 34.9<br>±1.6                                         | 14                                     | -              | FSH,LH                                             | Before fasting,<br>during fasting                                                       | Significant increase in 4a.m during fasting in FSH and LH                                                                                     |
| 8  | Azizi F, 1994<br>[24]                    | Tehran, Iran            | F:12                      | -                    | 20–25                                                      | 16                                     | -              | Total T4, total<br>T3                              | 1 <sup>ST</sup> day, 29 <sup>th</sup><br>day, 10 days<br>after                          | • Significant decrease in T4 and T3                                                                                                           |
| 9  | Bakir, 1994 [25]                         | Saudi Arabia            | M:9                       | NR                   | 40.11(5.37)<br>27–48                                       | 14                                     | -              | calcium, PTH                                       | Before fasting,<br>during fasting                                                       | Significant decrease in calcium                                                                                                               |
| 10 | Elati, J. 1995<br>[27]                   | Tunisia                 | F:16                      | -                    | 25–39                                                      | 13                                     | -              | calcium,<br>phosphorous,<br>cortisol               | 2 days before,<br>28 <sup>th</sup> day, 28<br>days after                                | <ul style="list-style-type: none"> <li>No significant change in calcium and phosphorous</li> <li>• nocturnal rise in cortisol</li> </ul>      |
| 11 | Aybak, 1995<br>[26]                      | Turkey                  | M:22                      | NR                   | 28 (4.2)                                                   | 16                                     | 30             | Cortisol, GH                                       | Baseline, 1 <sup>st</sup><br>day, 14 <sup>th</sup> day,<br>28 <sup>th</sup> day         | Significant increase in cortisol                                                                                                              |
| 12 | Dwivedi, S.<br>1996 [28]                 | India                   | M:12                      | -                    | 18–25                                                      | -                                      | 28             | cortisol                                           | 1 day before,<br>28 <sup>th</sup> day                                                   | Significant decrease in morning cortisol level                                                                                                |
| 13 | Iraki, 1997 [7]                          | Morocco                 | M:9                       |                      | 25 (1.2), 20–<br>32y                                       | NR                                     | NR             | calcium                                            | once before<br>Ramadan, 24 <sup>th</sup><br>day, 1 month<br>after the end of<br>Ramadan | Significant decrease in calcium                                                                                                               |
| 14 | Bilto, Y. Y.<br>1998, [29]               | Jordan                  | 33                        | 1997                 | 20–48                                                      | 11*                                    | 28             | calcium,<br>phosphorous                            | 1–7 days<br>before, day 21–<br>28                                                       | No significant change in calcium and phosphorous                                                                                              |
| 15 | Mira, S. A.<br>2002, [30]                | Saudi Arabia            | Overall: 58<br>F:10 M:48  | -                    | 37.05±9.87 F:<br>28.9±5.15<br>M:38.75<br>±9.79 (19–<br>56) | -                                      | -              | testosterone                                       | 1 day before,<br>21 <sup>st</sup> , 14 days<br>after                                    | <ul style="list-style-type: none"> <li>• M: no significant change in testosterone</li> <li>F: Significant decrease in testosterone</li> </ul> |

(Continued)



Table 2. (Continued)

|    | First Author<br>(year of<br>publication) | location of<br>study                        | Sample<br>size<br>/Gender | Season of<br>fasting | mean age<br>(age range),<br>years | mean<br>fasting<br>duration<br>(hours) | fasten<br>days             | Hormones/<br>biochemical<br>parameters<br>examined | measuring<br>times (relative<br>to the Ramadan<br>fast) | Results (after<br>compared with before<br>Ramadan months)                                                                                                                                                                                                                                                                                                          |
|----|------------------------------------------|---------------------------------------------|---------------------------|----------------------|-----------------------------------|----------------------------------------|----------------------------|----------------------------------------------------|---------------------------------------------------------|--------------------------------------------------------------------------------------------------------------------------------------------------------------------------------------------------------------------------------------------------------------------------------------------------------------------------------------------------------------------|
| 16 | Ben salem,<br>2003 [23]                  | Tunisia                                     | M: 11                     | December<br>2000     | 20–35<br>(26.5 ± 1.4)             | 11.5                                   | 16–22<br>(average<br>17 d) | Cortisol (a.m.,<br>p.m.)                           | Before<br>Ramadan,<br>during<br>Ramadan                 | No significant change                                                                                                                                                                                                                                                                                                                                              |
| 17 | Shahrzad, M<br>2003 [31]                 | Iran                                        | Overall:98<br>F:46 M:52   | Autumn               | 20.6±3.3                          | 11.5                                   | 30                         | TSH,TT4,TT3,<br>freeT4,freeT3                      | 1 <sup>st</sup> day, 28 <sup>th</sup> day               | Overall:<br>• Significant decrease in<br>total T4 and total T3<br>• no significant change<br>in TSH, free T4 or free<br>T3<br>M:<br>• Significant decrease in<br>total T4, total T3, TSH,<br>and freeT4<br>• no significant change<br>in free T3F:<br>• Significant decrease<br>in total T3<br>• no significant change<br>in total T4, TSH, free<br>T3, and freeT4 |
| 18 | El-Migdadi, F.<br>2004 [32]              | Jordan valley<br>and Ramtha<br>city, Jordan | M:40                      | Winter               | 17–25                             | 12                                     |                            | LH,<br>testosterone                                | before fast, end<br>of fast                             | no significant change in<br>LH or testosterone                                                                                                                                                                                                                                                                                                                     |
| 19 | Mesbahzadeh,<br>B 2005 [1]               | Birjand, Iran                               | M:52                      | winter               | 18–24                             | 12                                     | 28                         | Testosterone,<br>LH, FSH                           | 2 days before,<br>28 <sup>th</sup> day                  | • significant decrease in<br>total testosterone<br>• no significant change<br>in FSH or LH                                                                                                                                                                                                                                                                         |
| 20 | Ahmadinejad,<br>Z. 2006 [5]              | Tehran, Iran                                | 80 F:39<br>M:41           | Winter               | 22.7 ± 2.3<br>(18–29)             | 12                                     | more<br>than 15<br>days    | TSH, T3, T4                                        | 3 days before,<br>day 26                                | Overall:<br>• Significant decrease in<br>total T4<br>• no significant change<br>in total T3<br>• significant increase in<br>TSH<br>M:<br>• Significant decrease in<br>total T4<br>• no significant change<br>in total T3<br>• significant increase in<br>TSH<br>F:<br>• Significant decrease in<br>total T<br>• no significant change<br>in total T3 or TSH        |
| 21 | Ghaderi,2006<br>[33]                     | Iran                                        | M:32                      |                      | 26 ± 2 (24–<br>28)                | 12                                     | 28                         | LH, FSH,<br>Testosterone                           | 1 day before,<br>28 <sup>th</sup> day                   | • significant increase in<br>testosterone<br>• significant decrease in<br>FSH<br>• no significant change<br>in LH                                                                                                                                                                                                                                                  |
| 22 | Ghiravani, Z<br>2006 [34]                | Birjand, Iran                               | M:52                      | NR                   | 18–24                             | 12                                     | 28                         | T4, T3, TSH                                        | 2 days before,<br>28 <sup>th</sup> day                  | • significant increase in<br>total T4<br>• no significant change<br>in total T3 or TSH                                                                                                                                                                                                                                                                             |

(Continued)

Table 2. (Continued)

|    | First Author<br>(year of<br>publication) | location of<br>study | Sample<br>size<br>/Gender | Season of<br>fasting | mean age<br>(age range),<br>years       | mean<br>fasting<br>duration<br>(hours) | fasten<br>days | Hormones/<br>biochemical<br>parameters<br>examined | measuring<br>times (relative<br>to the Ramadan<br>fast)            | Results (after<br>compared with before<br>Ramadan months)                                                                                                                                                                                                                                                                                                                     |
|----|------------------------------------------|----------------------|---------------------------|----------------------|-----------------------------------------|----------------------------------------|----------------|----------------------------------------------------|--------------------------------------------------------------------|-------------------------------------------------------------------------------------------------------------------------------------------------------------------------------------------------------------------------------------------------------------------------------------------------------------------------------------------------------------------------------|
| 23 | Marbut, 2006<br>[35]                     | Tikrit, Iraq         | 20                        | Autumn               | NR                                      | 12                                     | NR             | PTH, calcium,<br>phosphorus                        | pre-Ramadan,<br>end of<br>Ramadan                                  | <ul style="list-style-type: none"> <li>• significant increase in PTH and calcium</li> <li>• no significant change in phosphorus</li> </ul>                                                                                                                                                                                                                                    |
| 24 | Mansi, K.2007<br>[36]                    | Jordan               | M:42                      | Autumn               | 21.3±1.6                                | 12                                     | NR             | testosterone,<br>LH, FSH, total<br>T3, total T4    | 1 day before,<br>day 21–28, 14<br>days after                       | <ul style="list-style-type: none"> <li>• Significant decrease in testosterone</li> <li>• significant increase in FSH</li> <li>• nonsignificant decrease in total T4</li> <li>• no significant changes in total T3 or LH</li> </ul>                                                                                                                                            |
| 25 | Shahabi, 2010<br>[37]                    | Iran                 | F: 24                     | 2008                 | 20.45 (0.99)                            | 11                                     | 23–24          | FSH, LH,<br>Estradiol                              | Ramadan, 2<br>months later                                         | <ul style="list-style-type: none"> <li>• no significant changes FSH or LH</li> </ul>                                                                                                                                                                                                                                                                                          |
| 26 | Sülü, B. 2010<br>[38]                    | Turkey               | Overall:45<br>F:22 M:23   | Autumn               | 21–51(28.7)<br>M:30.5±7.1<br>F:26.9±3.8 | 13.5*                                  | NR             | TSH, FT3, FT4                                      | 1 day before/<br>28 <sup>th</sup> day                              | <p><u>Overall:</u></p> <ul style="list-style-type: none"> <li>• Significant decrease TSH</li> <li>• no significant change in free T4 or free T3M:</li> <li>• Significant decrease free T4</li> <li>• no significant change in TSH or free T3</li> </ul> <p><u>F:</u></p> <ul style="list-style-type: none"> <li>• no significant change in TSH, free T4 or free T3</li> </ul> |
| 27 | Çağlayan, 2012<br>[39]                   | Turkey               | F: 30                     | Summer,2011          | 21–41                                   | 14.5                                   | 21–24          | FSH, LH,<br>testosterone,<br>PRL                   | 1–2 months<br>before, during<br>Ramadan                            | No significant change in FSH,LH,<br>testosterone, PRL                                                                                                                                                                                                                                                                                                                         |
| 28 | Bahijri, S., A,<br>2013 [40]             | Saudi Arabia         | Overall:23<br>F:5 M:18    | N/R                  | 18–42/<br>23.1 ± 1.2                    | NR                                     | NR             | cortisol                                           | before and 10–<br>15 days in to<br>Ramadan                         | No significant change in morning cortisol<br>• significant rise in PM cortisol                                                                                                                                                                                                                                                                                                |
| 29 | Sayedda, K.<br>2013 [41]                 | India                | M: 20                     | Summer               | 19–32                                   | 15                                     | 29             | calcium,<br>phosphorous                            | 2 days before,<br>29 <sup>th</sup> day                             | No significant change in calcium and<br>phosphorous                                                                                                                                                                                                                                                                                                                           |
| 30 | Al Nahari,2014<br>[42]                   | Saudi Arabia         | M:26                      | NR                   | NR                                      | NR                                     | NR             | Cortisol,<br>Testosterone,<br>TSH, FT4 and<br>FT3  | During fast/<br>post fast                                          | <ul style="list-style-type: none"> <li>• nonsignificant increase in cortisol</li> <li>• no significant change in testosterone</li> <li>• significant decrease in TSH</li> <li>• significant increase in free T4, and free T3</li> </ul>                                                                                                                                       |
| 31 | Bahijri, S., A,<br>2015 [43]             | Saudi Arabia         | Overall: 23<br>F:5 M:18   | NR                   | 18–42/<br>23.1 ± 1.2                    | NR                                     | NR             | PTH calcium,<br>phosphorus                         | before and 2<br>weeks in to<br>Ramadan                             | No significant change in calcium and<br>phosphorous                                                                                                                                                                                                                                                                                                                           |
| 32 | Talib, R. A.<br>2015 [44]                | Doha, Qatar          | M:45                      | NR                   | 27–56/<br>37 ± 7.2                      | NR                                     | 30             | total T, free T,<br>LH, FSH,<br>Estradiol          | 1 week before/<br>29 <sup>th</sup> or 30 <sup>th</sup> of<br>month | <ul style="list-style-type: none"> <li>• no significant change in testosterone or LH</li> <li>• significant decrease in FSH</li> </ul>                                                                                                                                                                                                                                        |

(Continued)

Table 2. (Continued)

|    | First Author<br>(year of<br>publication) | location of<br>study | Sample<br>size<br>/Gender | Season of<br>fasting | mean age<br>(age range),<br>years | mean<br>fasting<br>duration<br>(hours) | fasten<br>days      | Hormones/<br>biochemical<br>parameters<br>examined | measuring<br>times (relative<br>to the Ramadan<br>fast)                                            | Results (after<br>compared with before<br>Ramadan months)                                                                                              |
|----|------------------------------------------|----------------------|---------------------------|----------------------|-----------------------------------|----------------------------------------|---------------------|----------------------------------------------------|----------------------------------------------------------------------------------------------------|--------------------------------------------------------------------------------------------------------------------------------------------------------|
| 33 | Sedaghat, MR.<br>2017 [45]               | Mashhad,<br>Iran     | Total: 89<br>F:38 M:51    | Summer               | 34.52± 9.05<br>(20–50)            | 17                                     | At least<br>20 days | Calcium,<br>phosphorous                            | 1 week before/1<br>week after                                                                      | <ul style="list-style-type: none"> <li>• No significant change in calcium</li> <li>• significant reduction in phosphorous (total and males)</li> </ul> |
| 34 | Papazoglou,<br>2020 [46]                 | Greece               | M: 15                     | Spring 2020          | 21.1 ± 0.9                        | NR                                     | 30                  | Calcium,<br>morning<br>cortisol                    | 1 day before/<br>30 <sup>th</sup> day                                                              | <ul style="list-style-type: none"> <li>• No significant change in calcium</li> <li>• Significant decrease in morning cortisol</li> </ul>               |
| 35 | Riat, 2021 [47]                          | Germany              | Total: 34<br>F:15 M: 19   |                      | 25.1 ± 0.8                        | NR                                     | 29                  | Cortisol                                           | 1 week before<br>mid of RF last<br>days of RF, 1<br>week after RF,<br>and 1 month<br>after RF (T5) | Significant decrease in morning cortisol                                                                                                               |

<https://doi.org/10.1371/journal.pone.0299695.t002>

Interestingly, one study investigated the effects of Ramadan fasting on two different regions in Jordan [32]. The mean fasting hours reported across 28 studies ranged from 11 to 17 hours (13.44±1.97 hours).

We categorized the effects of Ramadan fasting according to the hormonal and biochemical markers studied: Thyroid hormones, Cortisol, Sex hormones, and Calcium, Phosphorous, and Parathyroid hormone (PTH).

### Effect of Ramadan on thyroid hormones

In overall 11 studies assessed the changes of Thyroid hormones (TSH, T3, AND T4) during Ramadan fasting [5, 16, 19–21, 24, 31, 34, 36, 38, 42]. Analysis of pooled data of participants did not show a significant change in TSH [5, 19–21, 24, 31, 34, 38, 42], Total T4 [5, 16, 19–21, 24, 31, 34, 36], Total T3 [5, 16, 19–21, 24, 31, 34, 36], Free T4 [19, 31, 38, 42], and Free T3 [31, 38, 42] levels as it is shown in Fig 2. There was no significant difference between female and male participants regarding TSH, Total T4, Total T3, Free T4, and Free T3 levels. Heterogeneity of studies were high regarding TSH, Total T4, Total T3, and Free T3 levels. Heterogeneity of studies with Free T4 levels were low ( $I^2 = 0.0\%$ ,  $H^2 = 1.0$ ); We repeated meta-analysis using inverse-variance fixed-model which its result did not differ from random-model.

### Effect of Ramadan on cortisol

Three studies evaluated changes in cortisol levels during 24-hours before and after Ramadan fasting. They all found a diurnal decrease in cortisol levels and nocturnal increase in serum cortisol levels during Ramadan fasting [27, 48, 49].

Two studies evaluated cortisol in the morning and in the evening [28, 40]. Dwivedi et al. [28] reported a significant reduction in morning cortisol levels, and significant rise in evening cortisol levels compared to pre-Ramadan values in 12 young healthy Muslims men. However, Bahijri et al. [40] did not observe any significant change in morning cortisol values ( $p = 0.06$ ), but significant rise in evening cortisol values ( $p = 0.01$ ) two weeks in to Ramadan in 23 young Ramadan practitioners compared to pre-Ramadan cortisol values.

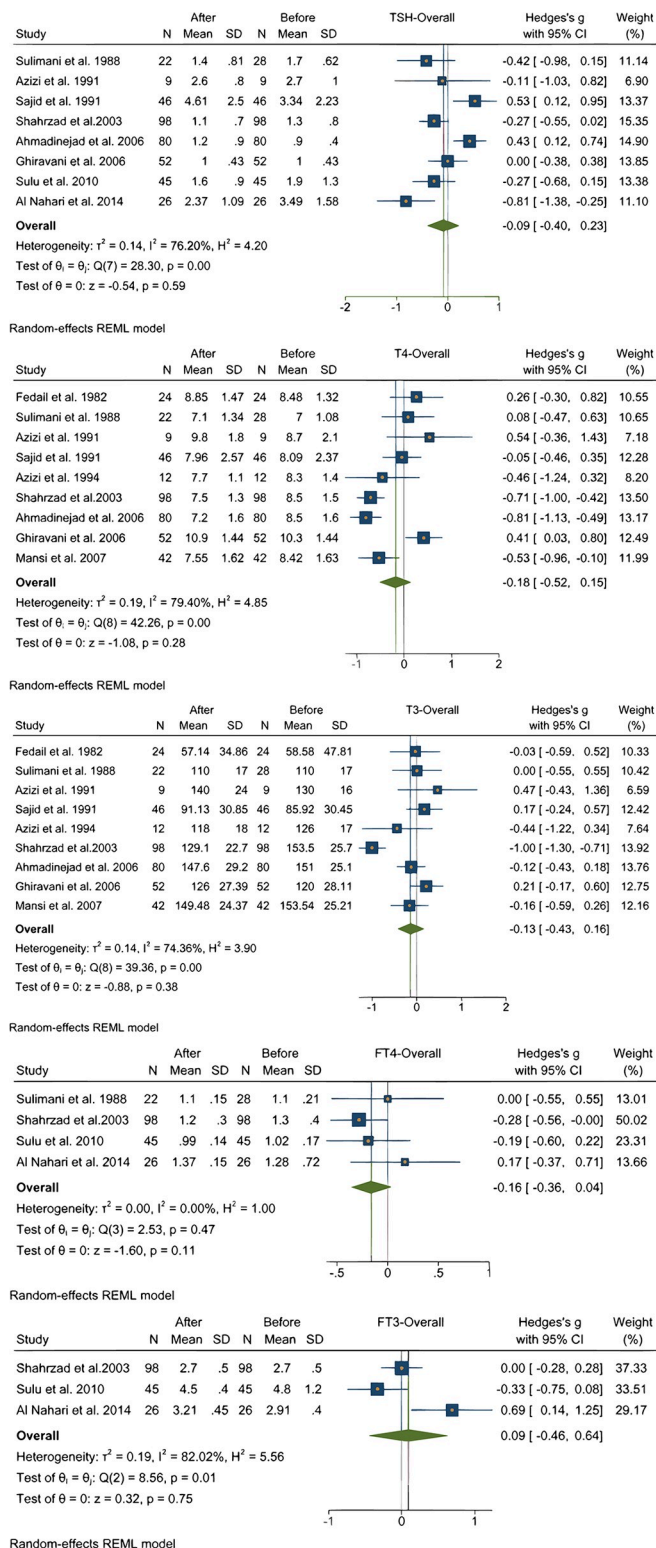**Fig 2. Effect of Ramadan fasting on thyroid hormones.**

<https://doi.org/10.1371/journal.pone.0299695.g002>

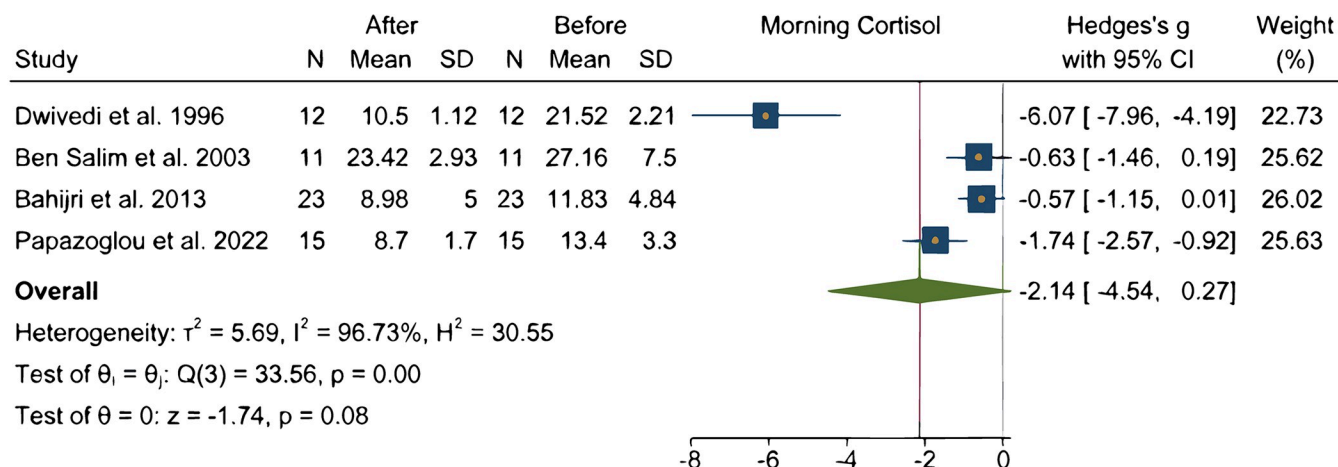

Random-effects REML model

Fig 3. Changes in cortisol levels during Ramadan fasting.

<https://doi.org/10.1371/journal.pone.0299695.g003>

Four studies evaluated the impact of Ramadan fasting on morning cortisol levels [23, 28, 40, 46]. Analysis of pooled data of participants showed a large insignificant decrease ( $P = 0.08$ ) in morning cortisol levels as it is shown in Fig 3.

### Effect of Ramadan fasting on sex hormones

In overall 8 studies assessed the changes of Sex hormones (Testosterone, LH, FSH) among men during Ramadan fasting. Analysis of pooled data of participants did not show a significant change in Testosterone [1, 17, 20, 30, 32, 36, 42, 44], LH [1, 17, 20, 32, 36, 44], FSH [1, 17, 20, 36, 44], Prolactin [17, 20] levels as it is shown in Fig 4. Heterogeneity of studies were high regarding Testosterone, LH, FSH, Prolactin levels.

El-Migdadi et al. [32] assessed serum LH and testosterone values pre- and post- Ramadan fasting in two groups healthy male individuals from two different regions of Jordan country. They found that fasting caused a significant increase in serum LH and testosterone values only in subjects of in the below sea level environment.

One study by Shahabi et al. evaluated the effect of Ramadan fasting on LH, FSH levels and Ovulation in females; and concluded that Islamic fasting causes neither significant variation in the secretion of hormones around ovulation nor does it influence the occurrence of ovulation [37].

### Effect of Ramadan fasting on calcium, phosphorous, and PTH

In overall 8 studies assessed the changes of Calcium, phosphorous, PTH during Ramadan fasting [18, 25, 27, 29, 35, 41, 43, 46]. Analysis of pooled data of participants did not show a significant change in Calcium [18, 27, 29, 35, 41, 43, 46], phosphorous [27, 29, 35, 41], PTH [25, 35, 43] levels as it is shown in Fig 5. Heterogeneity of studies were high regarding Calcium, phosphorous, PTH levels.

## Discussion

The objective of our systematic review and meta-analysis was to elucidate the impact of Ramadan fasting on the serum levels of major endocrinology hormones and biochemical parameters

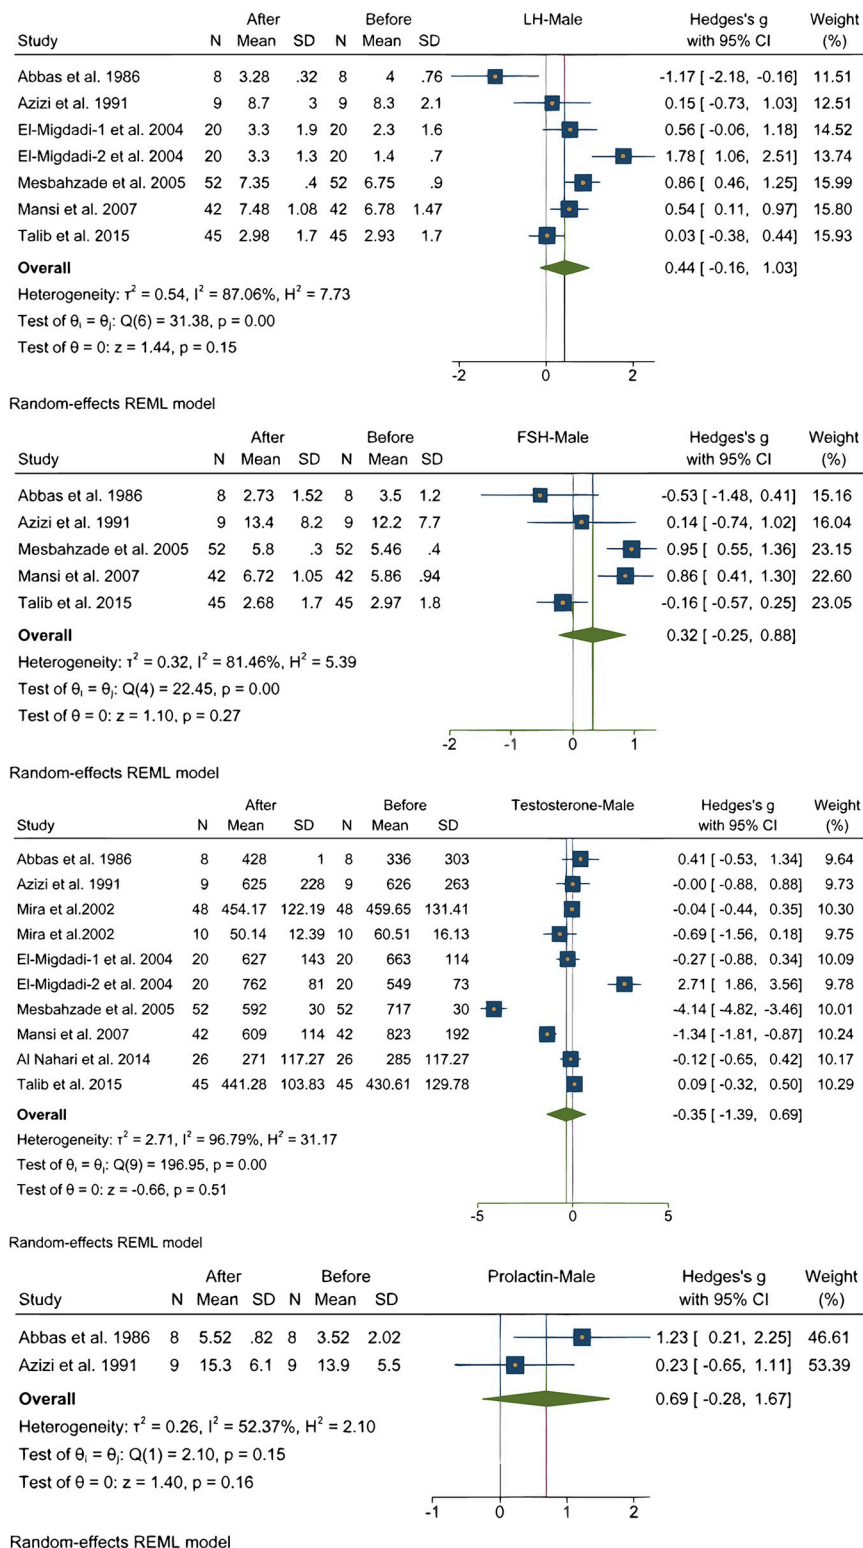**Fig 4. Impact of Ramadan fasting on sex hormones.**

<https://doi.org/10.1371/journal.pone.0299695.g004>



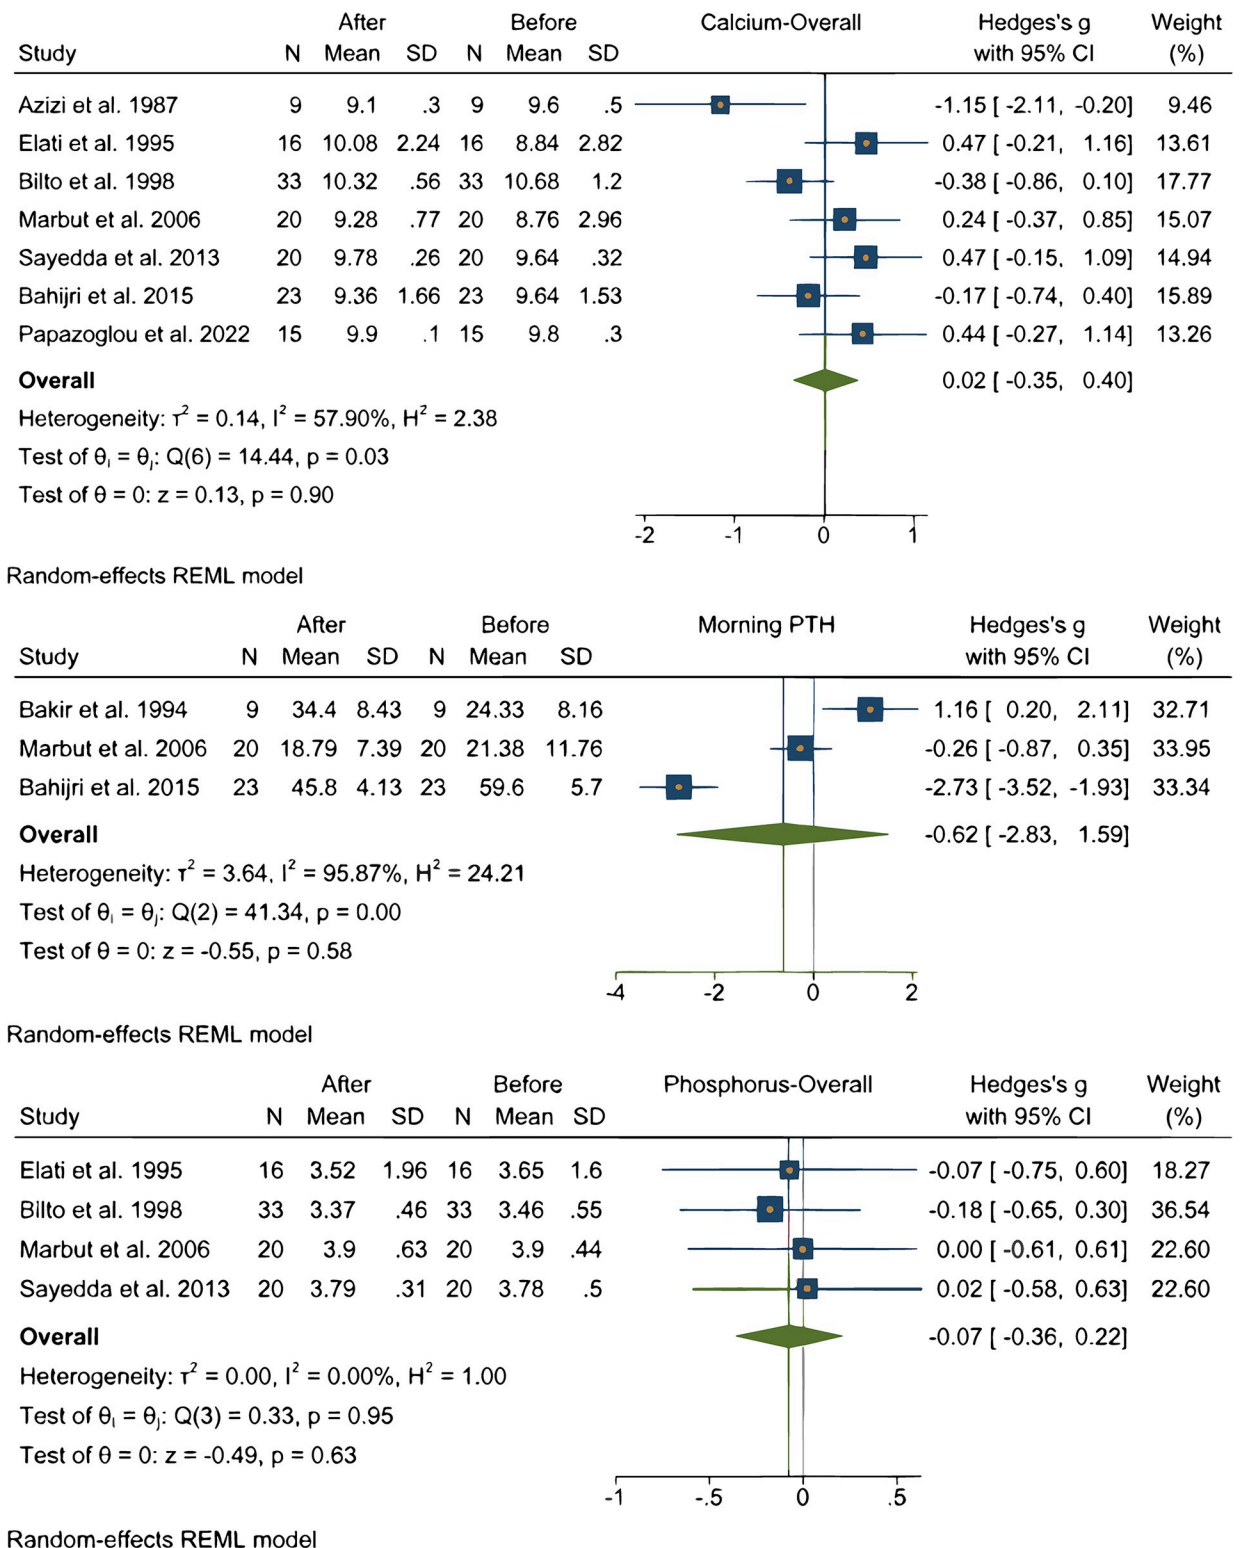

Fig 5. Effects of Ramadan fasting on calcium, phosphorous, and PTH levels.

<https://doi.org/10.1371/journal.pone.0299695.g005>

in healthy non-athlete adults. Our analysis incorporated data from a diverse array of studies, capturing variations in geographical location, gender, age, and fasting duration.

We found no significant changes in thyroid hormones (TSH, T3, T4), sex hormones (Testosterone, LH, FSH, Prolactin), and key biochemical markers (Calcium, Phosphorous, PTH) during Ramadan fasting across genders. However, we did observe a trend towards diurnal decrease and nocturnal increase in serum cortisol levels. While these findings were not statistically significant, they may still suggest physiological adaptations to the altered eating and sleeping patterns during Ramadan.

Our findings are in alignment with the notion that intermittent fasting during Ramadan does not induce drastic changes in endocrine functions or biochemical parameters in healthy individuals. This could potentially be attributed to the adaptive capacity of the human body, which has evolved mechanisms to maintain metabolic and hormonal homeostasis even during periods of fasting.

Ramadan fasting represents a well-recognized model of religious intermittent fasting that significantly alters eating and sleep patterns for an entire month. These changes could potentially disrupt the normal functioning of various body organs. However, several researchers have suggested that intermittent fasting may indeed have beneficial effects on human health [50, 51]. Numerous original research studies, systematic reviews, and meta-analyses have been conducted to evaluate the effects of Ramadan fasting on various health-related factors in both healthy and non-healthy individuals. It is important to note that as the Islamic world spans across diverse geographical locations, featuring different dietary patterns and social habits, the fasting effects observed in Ramadan practitioners from various regions are likely to differ [27].

During Ramadan, alterations in the sleep-wakefulness cycle and changes in social habits might potentially affect the circadian pattern of certain hormonal parameters. These include pituitary hormones (PRL, LH, FSH, GH, and TSH), steroid hormones (cortisol, testosterone), and thyroid hormones [52]. Our study found that Ramadan Intermittent Fasting could result in a considerable yet statistically insignificant decrease in Morning Cortisol levels. Furthermore, most of the reviewed studies reported a significant rise in Evening Cortisol levels. The consensus from these studies was that these changes were largely due to alterations in circadian rhythm during Ramadan.

The findings regarding changes in thyroid hormones during Ramadan were somewhat mixed. According to the results of included studies, Ramadan fasting does not appear to adversely affect thyroid function. Any observed changes in thyroid-related hormones remained within normal limits during this month.

### Effect of Ramadan fasting on glucometabolic markers

Our study initially intended to conduct a meta-analysis on glucometabolic markers. However, during our review process, an exhaustive systematic review by Faris et al. was published [9]. In light of their recent work, we instead performed a systematic update for newer studies on glucometabolic markers. Three new studies observed a minor rise in blood sugar levels (one of which was statistically insignificant) [53–55]. Additionally, one study reported a slight and insignificant rise in serum insulin levels [53]. None of these findings contradicted the previously mentioned systematic review.

Our meta-analysis revealed no significant changes in TSH, total T4, and total T3 during Ramadan. A significant reduction was, however, observed regarding free T4 values. In women, total T4 and T3 hormone concentrations may decrease due to alterations in binding proteins in the last days of Ramadan, but free hormone indices remain within normal limits [5, 24].



## Limitations

It is crucial to highlight the high heterogeneity observed for several parameters, which could be due to methodological differences across studies, such as the timing of sample collection, the participant's age, gender, and lifestyle factors. This heterogeneity underscores the need for standardized protocols in future studies to ensure comparability and consistency of findings. Despite the lack of a control group of non-fasted participants in the included studies, our review still offers valuable insights into the physiological adaptations during Ramadan fasting. It should be noted, though, that our findings may not apply to specific populations such as athletes, elderly, or those with underlying health conditions, and therefore caution must be exercised when generalizing the findings.

## Conclusion

This meta-analysis findings suggest that Ramadan fasting has not any adverse effect on gluco-metabolic markers, sexual hormones, thyroid hormones, calcium, phosphorus, and PTH. There was a near significant decrease of serum morning cortisol level, which it is due to the change in circadian rhythm. Ramadan Intermittent Fasting imposes minimum hormonal change, and is a safe practice.

## Supporting information

**S1 Checklist. PRISMA 2020 checklist.**  
(DOCX)

**S1 Data.**  
(ZIP)

## Author Contributions

**Conceptualization:** Mohammad Poursalehian, Shahrzad Mohseni, Mohammadreza Mohajeri-Tehrani, Mostafa Qorbani.

**Data curation:** Mohammad Poursalehian, Shahrzad Mohseni, Zhaleh Shadman, Rasha Atlasi.

**Formal analysis:** Mohammad Poursalehian.

**Investigation:** Mostafa Qorbani.

**Methodology:** Mohammad Poursalehian, Zhaleh Shadman, Mohsen Khoshniat Nikoo.

**Project administration:** Mohammadreza Mohajeri-Tehrani.

**Supervision:** Mohammadreza Mohajeri-Tehrani.

**Writing – original draft:** Shahrzad Mohseni, Zhaleh Shadman.

**Writing – review & editing:** Mohammad Poursalehian, Bagher Larijani.

## References

1. Mesbahzadeh B, Ghiravani Z, Mehrjoofard H. Effect of Ramadan fasting on secretion of sex hormones in healthy single males. *Eastern Mediterranean Health Journal*. 2005; 11(5–6):1120–3. PMID: [16761684](https://pubmed.ncbi.nlm.nih.gov/16761684/)
2. Mazidi M, Karimi E, Rezaee P, Nematy M, Salehi M. The effects of ramadan fasting on body composition. *Shiraz E Medical Journal*. 2014; 15(1).

3. Roky R, Houti I, Moussamih S, Qotbi S, Aadil N. Physiological and chronobiological changes during Ramadan intermittent fasting. *Annals of nutrition & metabolism*. 2004; 48(4):296–303. Epub 2004/09/29. <https://doi.org/10.1159/000081076> PMID: 15452402.
4. Azizi F. Islamic fasting and health. *Annals of Nutrition and Metabolism*. 2010; 56(4):273–82. <https://doi.org/10.1159/000295848> Export Date 5 January 2017. PMID: 20424438
5. Ahmadinejad Z, Ziaee V, Rezaee M, Yarmohammadi L, Shaikh H, Bozorgi F, et al. The effect of Ramadan fasting on thyroid hormone profile: A cohort study. *Pakistan Journal of Biological Sciences*. 2006; 9(10):1999–2002. <https://doi.org/10.3923/pjbs.2006.1999.2002> Export Date 5 January 2017.
6. Hajji J, Sabah A, Aljaberi MA, Lin C-Y, Huang L-Y. The Effect of Ramadan Fasting on the Coping Strategies Used by Male Footballers Affiliated with the Tunisian First Professional League. *Healthcare [Internet]*. 2023; 11(7). <https://doi.org/10.3390/healthcare11071053> PMID: 37046980
7. Iraki L, Bogdan A, Hakkou F, Amrani N, Abkari A, Touitou Y. Ramadan diet restrictions modify the circadian time structure in humans. A study on plasma gastrin, insulin, glucose, and calcium and on gastric pH. *Journal of Clinical Endocrinology and Metabolism*. 1997; 82(4):1261–73. <https://doi.org/10.1210/jcem.82.4.3860> PMID: 9100605
8. Feizollahzadeh S, Rasuli J, Kheirouri S, Alizadeh M. Augmented plasma adiponectin after prolonged fasting during ramadan in men. *Health promotion perspectives*. 2014; 4(1):77–81. Epub 2014/08/07. <https://doi.org/10.5681/hpp.2014.010> PMID: 25097840; PubMed Central PMCID: PMC4122042.
9. Faris MA, Jahrami H, BaHammam A, Kalaji Z, Madkour M, Hassanein M. A systematic review, meta-analysis, and meta-regression of the impact of diurnal intermittent fasting during Ramadan on glucometabolic markers in healthy subjects. *Diabetes Res Clin Pract*. 2020; 165:108226. Epub 20200522. <https://doi.org/10.1016/j.diabres.2020.108226> PMID: 32446800.
10. Moher D, Liberati A, Tetzlaff J, Altman DG. Preferred reporting items for systematic reviews and meta-analyses: the PRISMA statement. *Annals of internal medicine*. 2009; 151(4):264–9, w64. Epub 2009/07/23. <https://doi.org/10.7326/0003-4819-151-4-200908180-00135> PMID: 19622511.
11. Joanna Briggs Institute The Joanna Briggs Institute critical appraisal tools for use in JBI systematic Reviews-Checklist for Quasi-Experimental studies (non-randomised experimental studies). 2017.
12. Aromataris E, Munn Z. Joanna Briggs Institute Reviewer's Manual. The Joanna Briggs Institute [Internet]. 2017 [cited 2018 Jun 5]. 2017.
13. Porritt K, Gomersall J, Lockwood C. JBI's systematic reviews: study selection and critical appraisal. *AJN The American Journal of Nursing*. 2014; 114(6):47–52. <https://doi.org/10.1097/01.NAJ.0000450430.97383.64> PMID: 24869584
14. Higgins JP, Thompson SG, Deeks JJ, Altman DG. Measuring inconsistency in meta-analyses. *BMJ (Clinical research ed)*. 2003; 327(7414):557–60. Epub 2003/09/06. <https://doi.org/10.1136/bmj.327.7414.557> PMID: 12958120; PubMed Central PMCID: PMC192859.
15. Hedges LV. Distribution theory for Glass's estimator of effect size and related estimators. *Journal of Educational Statistics*. 1981; 6(2):107–28.
16. Fedail SS, Murphy D, Salih SY, Bolton CH, Harvey RF. Changes in certain blood constituents during Ramadan. *The American journal of clinical nutrition*. 1982; 36(2):350–3. Epub 1982/08/01. <https://doi.org/10.1093/ajcn/36.2.350> PMID: 7048891.
17. Abbas SM, Basalamah AH. Effects of Ramadhan fast on male fertility. *Archives of andrology*. 1986; 16(2):161–6. Epub 1986/01/01. <https://doi.org/10.3109/01485018608986937> PMID: 3090956.
18. AZIZI F, RASOULI H. SERUM GLUCOSE, BILIRUBIN, CALCIUM, PHOSPHORUS, PROTEIN AND ALBUMIN CONCENTRATIONS DURING RAMADAN. *Medical Journal of the Islamic Republic Of Iran*. 1987; 1(1):38–41.
19. Sulimani RA. The effects of Ramadan fasting on thyroid functions in healthy male subjects. *Nutrition Research*. 1988; 8(5):549–52. [https://doi.org/10.1016/S0271-5317\(88\)80076-9](https://doi.org/10.1016/S0271-5317(88)80076-9)
20. Azizi F. Serum levels of prolactin, thyrotropin, thyroid hormones, TRH responsiveness, and male reproductive function in intermittent Islamic fasting. *The Medical Journal of The Islamic Republic of Iran*. 1991; 5:71–4.
21. Sajid KM, Akhtar M, Malik GQ. Ramadan fasting and thyroid hormone profile. *JPMA The Journal of the Pakistan Medical Association*. 1991; 41(9):213–6. Epub 1991/09/01. PMID: 1744968.
22. Bakir S, Kordy M, Abdel Gader A, Karrar O. The Effects of Ramadan Fasting on the Levels of Gonadotrophins. *Journal of the Islamic Medical Association of North America*. 1992; 24. <https://doi.org/10.5915/24-1-15469>
23. Ben Salem L, B'Chir S, Bchir F, Bouguerra R, Ben Slama C. Cortisol rhythm during Ramadan. *Eastern Mediterranean Health Journal*. 2003; 9(5–6):1093–8.
24. Azizi F, Nafarabadi M, Amini M. Serum thyroid hormone and thyrotropin concentrations during Ramadan in healthy women. *Emirates Med J*. 1994; 12:140–3.

25. Bakir SM, AL-Attas O, Kordy M, Gader A, Muzrachi A, Mohammady I. The effect of Ramadan fast on the diurnal change of total calcium, parathyroid hormone and calcitonin. *Med J Cairo Univ Gune*. 1994; 62(2):485–90.
26. Aybak M, Turkoglu A, Sermet A, Denli O. Effect of Ramadan fasting on platelet aggregation in healthy male subjects. *Eur J Appl Physiol*. 1996; 73(6):552–6. WOS:A1996UV76100009. <https://doi.org/10.1007/BF00357678> PMID: 8817126
27. El Ati J, Beji C, Danguir J. Increased fat oxidation during Ramadan fasting in healthy women: An adaptive mechanism for body-weight maintenance. *American Journal of Clinical Nutrition*. 1995; 62(2):302–7. <https://doi.org/10.1093/ajcn/62.2.302> PMID: 7625336
28. Dwivedi S, Nalini K, Assim MO. Metabolic alterations during Ramadan fast. *Indian Journal of Clinical Biochemistry*. 1996; 11(2):171–2. <https://doi.org/10.1007/BF02896439>
29. Bilto YY. Effects of Ramadan fasting on body weight and the biochemical and haematological parameters of the blood. *Arab Gulf Journal of Scientific Research*. 1998; 16(1):1–13. WOS:000076077400001.
30. Mira SA. Changes in testosterone levels during the fasting month in Ramadan. *Qatar Medical Journal*. 2002; 11(2):19–21.
31. Shahrzad M, Larijani B, Yarahmadi S, Amini M, Baradar Jalili R, Aghakhani S, et al. The effects of Islamic fasting on the thyroid function in young adults. *Iranian Journal of Endocrinology and Metabolism*. 2003; 5(2):121–5.
32. El-Migdadi F, Shotar A, El-Akawi Z, Banihani I, Abudheese R, Oweis W. Effect of fasting during the month of Ramadan on serum levels of luteinizing hormone and testosterone in people living in the below sea level environment in the Jordan Valley. *Neuroendocrinology Letters*. 2004; 25(1–2):75–7. WOS:000221565000013. PMID: 15159687
33. Ghaderi F, KHAMENEH S. EFFECT OF RAMADAN FASTING ON SEXUAL DESIRE THE ROLE OF HORMONES OR NEOCORTEX. 2006.
34. Ghiravani Z, Mesbahzadeh B. The effect of Ramadan fasting on secretion thyroid hormones in healthy male adults. 2006.
35. Marbut MM, Abbass MT, Al-Kotobe MF. The effect of Ramadan fasting on serum calcium, phosphorus, and Parathyroid hormone in normal healthy subjects. *The Medical Journal of Tikrit*. 2006; 1(121):58–60.
36. Mansi K, Amneh M. Impact of Ramadan fasting on metabolism and on serum levels of some hormones among healthy Jordanian students. *Journal of Medical Sciences*. 2007; 7(5):755–61. <https://doi.org/10.3923/jms.2007.755.761>
37. Shahabi S, Esmaeilzadeh S, Amiri MG, Faramarzi M, Firouzjahee AR, Esmaeili T. Does Islamic Fasting Affect Gonadotropin around Female Ovulation? *Int J Fertil Steril*. 2010; 4(3):94–7. WOS:000285278400001.
38. Sulu B, Ozturk B, Guven A, Kilic K. The Effect of Long-Term Controlled Fasting (The Ramadan Model) on Body Mass Index, Blood Biochemistry and Oxidative Stress Factors. *Turk Klin Tip Bilim Derg*. 2010; 30(3):855–63. WOS:000281262200004.
39. Caglayan EK, Gocmen AY, Delibas N. Effects of long-term fasting on female hormone levels: Ramadan model. *Clin Exp Obstet Gynecol*. 2014; 41(1):17–9. WOS:000343848600003. PMID: 24707675
40. Bahijri S, Borai A, Ajabnoor G, Abdul Khaliq A, AlQassas I, Al-Shehri D, et al. Relative metabolic stability, but disrupted circadian cortisol secretion during the fasting month of Ramadan. *PloS one*. 2013; 8(4):e60917. Epub 2013/05/03. <https://doi.org/10.1371/journal.pone.0060917> PMID: 23637777; PubMed Central PMCID: PMC3630175.
41. Sayedda K, Kamal S, Ahmed QS. Effect of Ramadan fasting on anthropometric parameters, blood pressure, creatine phosphokinase activity, serum calcium and phosphorus in healthy students of Shri Ram Murti Smarak Institute of Medical Sciences, Bareilly-UP. *National Journal of Physiology, Pharmacy and Pharmacology*. 2013; 3(1):48–52. <https://doi.org/10.5455/njppp.2013.3.48-52>
42. Al Nahari H, Kouja H. Impact of Ramadan Fasting on Some Biochemical Aspects in Healthy Subjects. *International Journal of Medical and Health Sciences Research*. 2014; 1(12):144–54.
43. Bahijri SM, Ajabnoor GM, Borai A, Al-Aama JY, Chrousos GP. Effect of Ramadan fasting in Saudi Arabia on serum bone profile and immunoglobulins. *Therapeutic advances in endocrinology and metabolism*. 2015; 6(5):223–32. Epub 2016/10/01. <https://doi.org/10.1177/2042018815594527> PMID: 26445645; PubMed Central PMCID: PMC4579416.
44. Talib RA, Canguven O, Al-Rumaihi K, Al Ansari A, Alani M. The effect of fasting on erectile function and sexual desire on men in the month of Ramadan. *Urology journal*. 2015; 12(2):2099–102. Epub 2015/04/30. PMID: 25923156.
45. Sedaghat MR, Askarizadeh F, Heravian J, Rakhshandadi T, Nematy M, Mahmoodi Z, et al. The Effects of Islamic Fasting on Blood Hematological-Biochemical Parameters. *Journal of Nutrition, Fasting and Health*. 2017; 5(2):56–62. <https://doi.org/10.22038/jfh.2017.22778.1085>

46. Papazoglou AS, Moysidis DV, Tsagkaris C, Vouloagkas I, Karagiannidis E, Kartas A, et al. Impact of religious fasting on metabolic and hematological profile in both dyslipidemic and non-dyslipidemic fasters. *European journal of clinical nutrition*. 2022; 76(6):891–8. <https://doi.org/10.1038/s41430-021-01053-7> rayyan-349765162. PMID: 34853413
47. Riat A, Suw i A, Ghashang SK, Buettner M, Eljurnazi L, et al. Ramadan Fasting in Germany (17–18 h/Day): Effect on Cortisol and Brain-Derived Neurotrophic Factor in Association With Mood and Body Composition Parameters. *Front Nutr*. 2021; 8:697920. <https://doi.org/10.3389/fnut.2021.697920> rayyan-349764541. PMID: 34458302
48. al-Hadramy MS, Zawawi TH, Abdelwahab SM. Altered cortisol levels in relation to Ramadan. *European journal of clinical nutrition*. 1988; 42(4):359–62. Epub 1988/04/01. PMID: 3396527.
49. Haouari M, Haouari-Oukerro F, Sfaxi A, Ben Rayana MC, Kâabachi N, Mbazâa A. How Ramadan fasting affects caloric consumption, body weight, and circadian evolution of cortisol serum levels in young, healthy male volunteers. *Hormone and metabolic research = Hormon- und Stoffwechselforschung = Hormones et métabolisme*. 2008; 40(8):575–7. Epub 2008/04/09. <https://doi.org/10.1055/s-2008-1065321> PMID: 18393168.
50. Patterson RE, Laughlin GA, LaCroix AZ, Hartman SJ, Natarajan L, Senger CM, et al. Intermittent fasting and human metabolic health. *Journal of the Academy of Nutrition and Dietetics*. 2015; 115(8):1203–12. <https://doi.org/10.1016/j.jand.2015.02.018> PMID: 25857868
51. Patterson RE, Sears DD. Metabolic effects of intermittent fasting. *Annual review of nutrition*. 2017; 37.
52. Bogdan A, Bouchareb B, Touitou Y. Ramadan fasting alters endocrine and neuroendocrine circadian patterns. Meal-time as a synchronizer in humans? *Life sciences*. 2001; 68(14):1607–15. Epub 2001/03/27. [https://doi.org/10.1016/s0024-3205\(01\)00966-3](https://doi.org/10.1016/s0024-3205(01)00966-3) PMID: 11263673.
53. Celik OM, Kocak T, Koksai E. Effects of Diurnal Ramadan Intermittent Fasting on Cardiometabolic Risk Factors and Sleep Quality in Healthy Turkish Adults. *ECOLOGY OF FOOD AND NUTRITION*. <https://doi.org/10.1080/03670244.2022.2089878> rayyan-349763582. PMID: 35730413
54. Khan N, Rafi SMT, Siddiqui S, Shakeel S, Haseeb ur R, Hasan W. Effect of Ramadan on glucose levels, serum lipid profile, and blood pressure among fasting and nonfasting medical students in a public university of Karachi. *IBNOSINA JOURNAL OF MEDICINE AND BIOMEDICAL SCIENCES*. 2020; 12(3):177–84. [https://doi.org/10.4103/ijmbs.ijmbs\\_84\\_20](https://doi.org/10.4103/ijmbs.ijmbs_84_20) rayyan-349763721.
55. Urooj A, Kotebagilu NP, Shivanna LM, An, an S, Thantry AN, Siraj SF. Effect of ramadan fasting on body composition, biochemical profile, and antioxidant status in a sample of healthy individuals. *International Journal of Endocrinology and Metabolism*. 2020; 18(4). <https://doi.org/10.5812/ijem.107641> rayyan-349763845. PMID: 33613680
